# Supplementary material for: Whole-embryonic identification of maternal microchimeric cell types in mouse using single-cell RNA sequencing
Source: Research Square preprint supplement (doi:10.21203/rs.3.rs-1549180/v1), 2022-04-15
Supplement: Supplementary file 1 [file 3f3c7da11900123f84dfc046.docx]

**Supplementary Table 2** Major cell types of clusters from UMAP analysis based on 20 PCs

| **Cluster #** | **Cell type** |
| --- | --- |
| 0 | microglial cell |
| 1 | fibroblast |
| 2 | endothelial cell |
| 3 | mesenchymal stem cell of adipose |
| 4 | B cell |
| 5 | myeloid cell |
| 6 | basal cell |
| 7 | keratinocyte stem cell |
| 8 | epithelial cell of large intestine |
| 9 | Slamf1-negative multipotent progenitor cell |
| 10 | immature T cell |
| 11 | enterocyte of epithelium of large intestine |
| 12 | large intestine goblet cell |
| 13 | astrocyte |
| 14 | luminal epithelial cell of mammary gland |
| 15 | basal cell of epidermis |
| 16 | epithelial cell of proximal tubule |
| 17 | granulocyte |
| 18 | immature T cell |
| 19 | luminal epithelial cell of mammary gland |
| 20 | natural killer cell |
| 21 | pancreatic A cell |
| 22 | type B pancreatic cell |
| 23 | endothelial cell |
| 24 | bladder urothelial cell |
| 25 | pancreatic acinar cell |
| 26 | bladder cell |
| 27 | hepatocyte |
| 28 | oligodendrocyte |
| 29 | mesenchymal cell |
| 30 | myofibroblast cell |
| 31 | stromal cell |
| 32 | cardiac muscle cell |
