# Supplementary material for: Whole-embryonic identification of maternal microchimeric cell types in mouse using single-cell RNA sequencing
Source: Research Square preprint supplement (doi:10.21203/rs.3.rs-1549180/v1), 2022-04-15
Supplement: Supplementary file 2 [file e79104be19b3b94f4d3ec73a.docx]

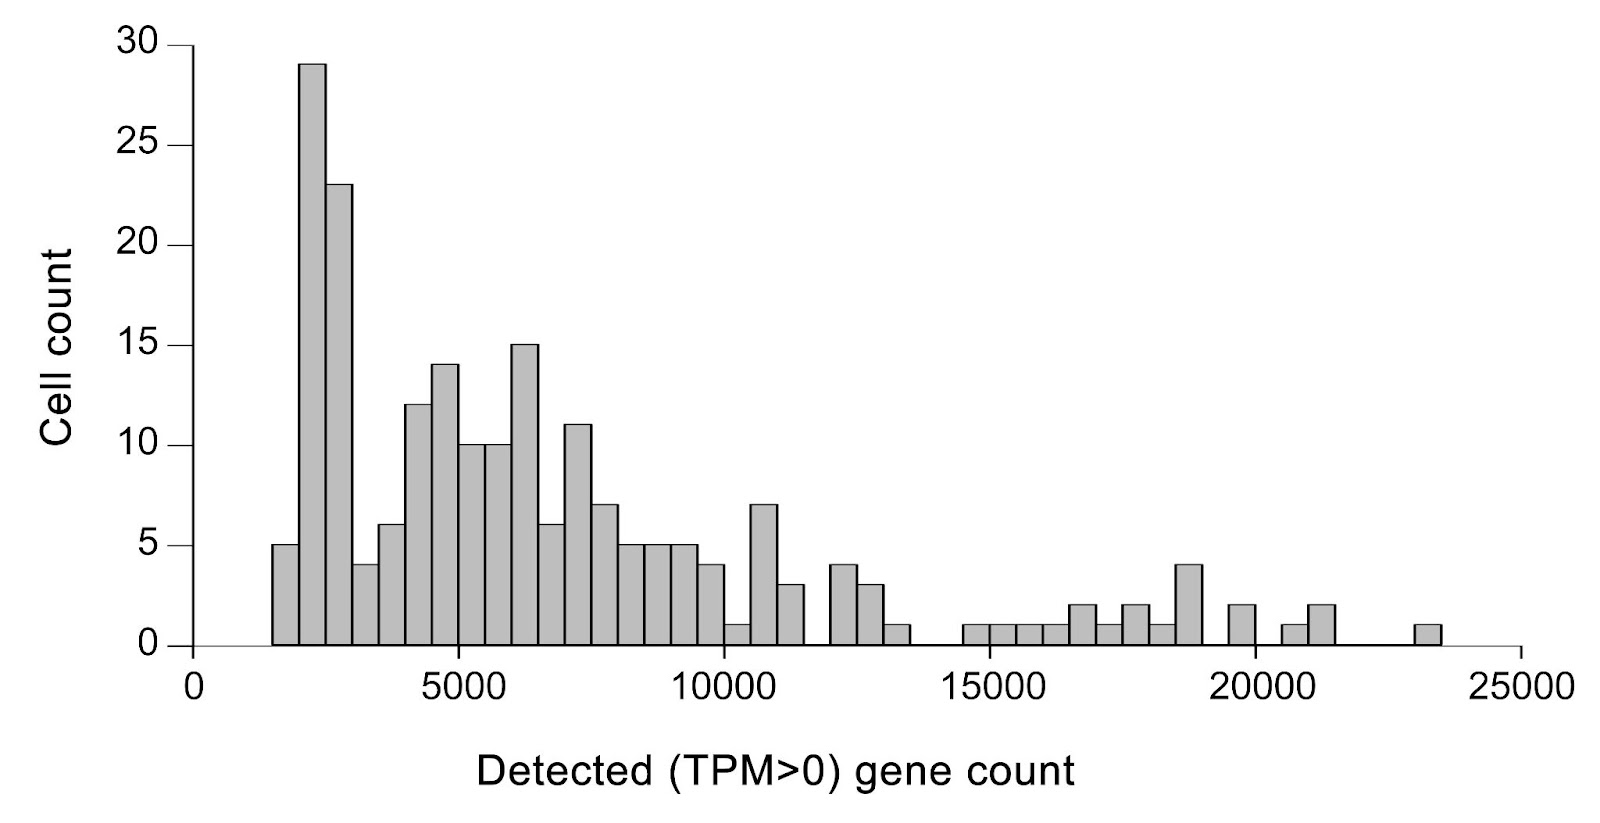
**Supplementary Figure 1** Gene count in sequenced cells. The number of genes expressed (TPM>0) in isolated sequenced cells (MMc cells) was determined by analyzing scRNA-seq data.

**Supplementary Figure 2** Organs and cells included in the Tabula Muris data for female mice. (**a**) Organs represented in the data and their sample (cell) number. (**b**) Cell types represented in the data and their sample (cell) number.


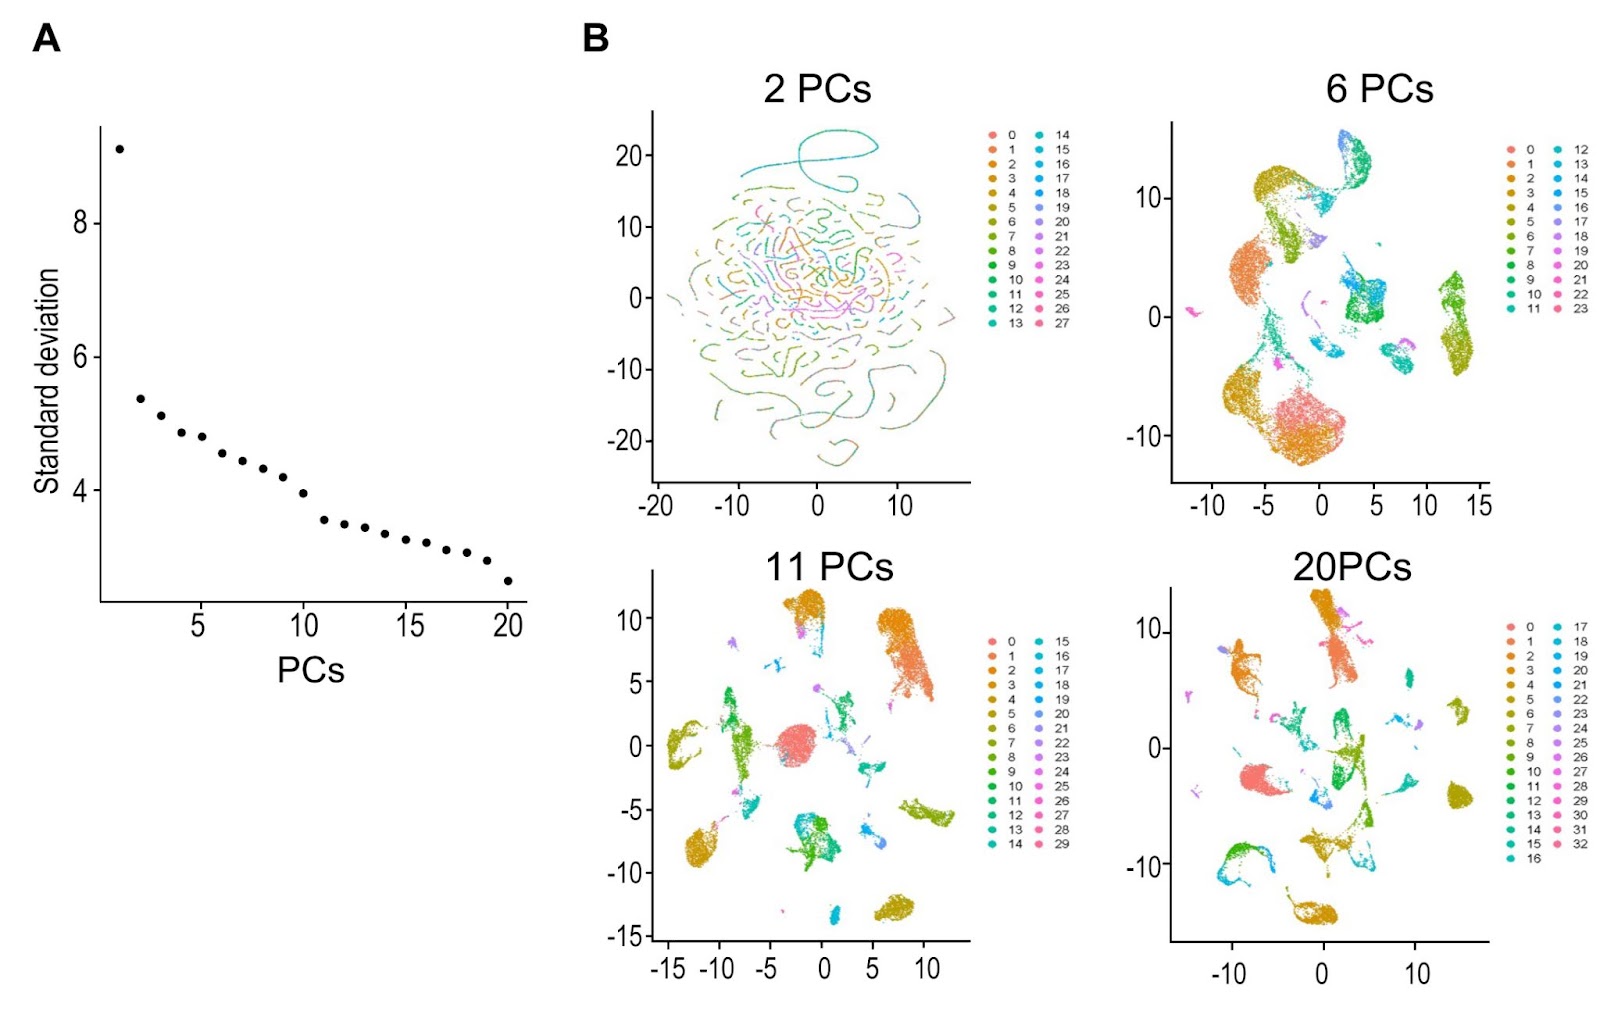
**Supplementary Figure 3** Identification of optimal PC sets for classifying the Tabula Muris scRNA-seq data. (**a**) Elbow plot representing the relationship between standard deviation and the number of PCs used in calculation. A major change in standard deviation was observed with 2, 6, 11, and 20 PCs. (**b**) UMAP representation of Tabula Muris scRNA-seq data using the PC sets identified in (**a**).
